# Supplementary material for: The Characterization of RNA Viruses in Tropical Seawater Using Targeted PCR and Metagenomics
Source: PubMed Central journal article supplement — mBio. 2014 Jun 17;5(3):e01210-14. doi: 10.1128/mBio.01210-14 (PMC4068258; doi:10.1128/mbio.01210-14), 2014-06-17
Supplement: mbo003141874st1.pdf [file mbo003141874st1.pdf]

Table S1

| <b>Virus Abbreviation</b> | <b>Fullname</b>                            | <b>Accession number</b> | <b>Family</b>   | <b>Genus</b>    |
|---------------------------|--------------------------------------------|-------------------------|-----------------|-----------------|
| SPMMV                     | Sweet potato mild mottle virus             | NC_003797               | Potyviridae     | Ipomovirus      |
| WSMV                      | Wheat streak mosaic virus                  | NC_001886               | Potyviridae     | Tritimovirus    |
| BVY                       | Blackberry virus Y                         | NC_008558               | Potyviridae     | Brambyvirus     |
| RgMV                      | Ryegrass mosaic virus                      | NC_001814               | Potyviridae     | Rymovirus       |
| PVY                       | Potato virus Y                             | NC_001616               | Potyviridae     | Potyvirus       |
| BYMV                      | Barley yellow mosaic virus                 | NC_001616               | Potyviridae     | Bymovirus       |
| MMV                       | Maclura mosaic virus                       | U58771                  | Potyviridae     | Macluravirus    |
| AEV                       | Avian encephalomyelitis virus              | NC_003990               | Picornaviridae  | Tremovirus      |
| HAV                       | Hepatitis A virus                          | NC_001489               | Picornaviridae  | Hepatovirus     |
| HPeV                      | Human parechovirus                         | NC_001897               | Picornaviridae  | Parechovirus    |
| DHBV                      | Duck hepatitis A virus 1                   | NC_008250               | Picornaviridae  | Avihepatovirus  |
| PV                        | Human enterovirus C                        | NC_002058               | Picornaviridae  | Enterovirus     |
| ASV                       | Avian sapelovirus                          | NC_006553               | Picornaviridae  | Sapelovirus     |
| PTV                       | Porcine teschovirus 1                      | NC_003985               | Picornaviridae  | Teschovirus     |
| FMDV                      | Foot-and-mouth disease virus A             | NC_011450               | Picornaviridae  | Aphthovirus     |
| ERBV                      | Equine rhinitis B virus 1                  | NC_003983               | Picornaviridae  | Erbovirus       |
| EMCV                      | Encephalomyocarditis virus                 | NC_001479               | Picornaviridae  | Cardiovirus     |
| SVV                       | Seneca Valley virus                        | NC_011349               | Picornaviridae  | Senecavirus     |
| AiV                       | Aichi virus                                | NC_001918               | Picornaviridae  | Kobuvirus       |
| AuRNAV                    | Aurantiochytrium single-stranded RNA virus | NC_007522               | Labyrnviridae   | Labyrnavirus    |
| IFV                       | Infectious flacherie virus                 | NC_003781               | Iflaviridae     | Iflavirus       |
| ABPV                      | Acute bee paralysis virus                  | NC_002548               | Dicistroviridae | Aparavirus      |
| CrPV                      | Cricket paralysis virus                    | NC_003924               | Dicistroviridae | Cripavirus      |
| DCV                       | Drosophila C virus                         | NC_001834               | Dicistroviridae | Cripavirus      |
| TSV                       | Taura syndrome virus                       | NC_003005               | Dicistroviridae | Aparavirus      |
| ToTV                      | Tomato torrado virus                       | NC_009013               | Secoviridae     | Torradovirus    |
| RTSV                      | Rice tungro spherical virus                | NC_001632               | Secoviridae     | Waikavirus      |
| PYFV                      | Parsnip yellow fleck virus                 | NC_003628               | Secoviridae     | Sequivirus      |
| CRLV                      | Cherry rasp leaf virus                     | NC_006271               | Secoviridae     | Cheravirus      |
| TRSV                      | Tobacco ringspot virus 1                   | NC_005097               | Secoviridae     | Nepovirus       |
| CPMV                      | Cowpea mosaic virus                        | NC_003549               | Secoviridae     | Comovirus       |
| BBWV                      | Broad bean wilt virus 1                    | NC_005289               | Secoviridae     | Fabavirus       |
| SDV                       | Satsuma dwarf virus                        | NC_003785               | Secoviridae     | Sadwavirus      |
| HaRNAV                    | Heterosigma akashiwo RNA virus             | NC_005281               | Marnaviridae    | Marnavirus      |
| JP-B                      | Marine RNA virus JP-B                      | NC_009758               | Unassigned      | Unassigned      |
| CtenRNAV                  | Chaetoceros tenuissimus RNA Virus          | AB375474                | Unassigned      | Bacillarnavirus |
| RsRNAV                    | Rhizosolenia setigera RNA Virus            | AB243297                | Unassigned      | Bacillarnavirus |
| CsfrRNAV                  | Chaetoceros scoialis f. radians RNA Virus  | NC_012212               | Unassigned      | Bacillarnavirus |
| CcloRNAV01                | Cylindrotheca closterium RNA Virus 01      | NA                      | Unassigned      | Unassigned      |
| CcloRNAV02                | Cylindrotheca closterium RNA Virus 02      | NA                      | Unassigned      | Unassigned      |
| JP-A                      | Marine RNA virus JP-A                      | NC_009757               | Unassigned      | Unassigned      |

| <b>Virus Abbreviation</b> | <b>Fullname</b>                         | <b>Accession number</b> | <b>Family</b> | <b>Genus</b>   |
|---------------------------|-----------------------------------------|-------------------------|---------------|----------------|
| AHSV-9                    | African horsesickness virus             | AAC40586                | Reoviridae    | Orbivirus      |
| ApRV                      | Aedes pseudoscutellaris reovirus        | AAZ94069                | Reoviridae    | Dinovernavirus |
| BAV-Ch                    | Banna virus                             | AF168005                | Reoviridae    | Seadornavirus  |
| BmCPV-1                   | Bombyx mori cypovirus 1                 | AAK20302                | Reoviridae    | Cypovirus      |
| BoRV-A/UK                 | Bovine rotavirus                        | CAA39085                | Reoviridae    | Rotavirus A    |
| BTV-2                     | Bluetongue virus 2                      | AAA88823                | Reoviridae    | Orbivirus      |
| CHUV                      | Chuzan virus                            | BAA76549                | Reoviridae    | Orbivirus      |
| CPRV                      | Cryphonectria parasitica mycoreovirus-1 | AAP45577                | Reoviridae    | Mycoreovirus   |
| CSRV                      | Chum salmon reovirus CS                 | AAL31497                | Reoviridae    | Aquareovirus   |
| CTFV-F1                   | Colorado tick fever virus               | AAK00595                | Reoviridae    | Coltivirus     |
| DsCPV-1                   | Dendrolimus punctatus cypovirus 1       | AAN46860                | Reoviridae    | Cypovirus      |
| ESRV                      | Eriocheir sinensis reovirus             | AAT11887                | Reoviridae    | Cardoreovirus  |
| EYAV-Fr578                | Eyach virus                             | AAM18342                | Reoviridae    | Coltivirus     |
| GCRV-873                  | Grass carp reovirus                     | ADT79734                | Reoviridae    | Aquareovirus   |
| GSRV                      | Golden shiner reovirus                  | AF403399                | Reoviridae    | Aquareovirus   |
| KDV-Ja7075                | Kadipiro virus                          | AAF78848                | Reoviridae    | Seadornavirus  |
| MpRV                      | Micromonas pusilla reovirus             | AAZ94042                | Reoviridae    | Mimoreovirus   |
| MRV-1                     | Mammalian orthoreovirus 1               | AAA47234                | Reoviridae    | Orthoreovirus  |
| MRV-2                     | Mammalian orthoreovirus 2               | AAA47245                | Reoviridae    | Orthoreovirus  |
| NLRV-lz                   | Nilaparvata lugens reovirus             | BAA08542                | Reoviridae    | Fijivirus      |
| PoRV-C/Co                 | Porcine rotavirus C                     | AAB00801                | Reoviridae    | Rotavirus C    |
| RaRV                      | Mycoreovirus 3                          | BAC98431                | Reoviridae    | Mycoreovirus   |
| RDV-A                     | Rice dwarf virus-A                      | BAA14222                | Reoviridae    | Phytoreovirus  |
| RDV-Ch                    | Rice dwarf virus-Ch                     | AAB18743                | Reoviridae    | Phytoreovirus  |
| RRSV-Th                   | Rice ragged stunt virus                 | AAC36456                | Reoviridae    | Oryzavirus     |
| SBRV                      | Striped bass reovirus                   | AAM93410                | Reoviridae    | Aquareovirus   |
| SiRV-A/SA11               | Simian rotavirus                        | AAC58684                | Reoviridae    | Rotavirus A    |

| Virus Abbreviation | Fullname                                                                                  | Accession number(s) | Family          | Genus           |
|--------------------|-------------------------------------------------------------------------------------------|---------------------|-----------------|-----------------|
| ABPV               | Acute bee paralysis virus                                                                 | NC_002548           | Dicistroviridae | Aparavirus      |
| AEV                | Avian encephalomyelitis virus                                                             | NC_003990           | Picornaviridae  | Tremovirus      |
| AiV                | Aichi virus                                                                               | NC_001918           | Picornaviridae  | Kobuvirus       |
| ASV                | Avian sapelovirus                                                                         | NC_006553           | Picornaviridae  | Sapelovirus     |
| AuRNAV             | Aurantiochytrium single-stranded RNA virus                                                | NC_007522           | Labyrnviridae   | Labyrnavirus    |
| BBWV               | Broad bean wilt virus 1                                                                   | NC_005289           | Secoviridae     | Fabavirus       |
| CcloRNAV01         | Cylindrotheca closterium RNA Virus 01                                                     | NA                  | Unassigned      | Unassigned      |
| CcloRNAV02         | Cylindrotheca closterium RNA Virus 02                                                     | NA                  | Unassigned      | Unassigned      |
| CPMV               | Cowpea mosaic virus                                                                       | NC_003549           | Secoviridae     | Comovirus       |
| CRLV               | Cherry rasp leaf virus                                                                    | NC_006271           | Secoviridae     | Cheravirus      |
| CrPV               | Cricket paralysis virus                                                                   | NC_003924           | Dicistroviridae | Cripavirus      |
| CsfrRNAV           | Chaetoceros scoialis f. radians RNA Virus                                                 | NC_012212           | Unassigned      | Bacillarnavirus |
| CtenRNAV           | Chaetoceros tenuissimus RNA Virus                                                         | AB375474            | Unassigned      | Bacillarnavirus |
| DCV                | Drosophila C virus                                                                        | NC_001834           | Dicistroviridae | Cripavirus      |
| DHBV               | Duck hepatitis A virus 1                                                                  | NC_008250           | Picornaviridae  | Avihepatovirus  |
| EMCV               | Encephalomyocarditis virus                                                                | NC_001479           | Picornaviridae  | Cardiovirus     |
| ERBV               | Equine rhinitis B virus 1                                                                 | NC_003983           | Picornaviridae  | Erbovirus       |
| FMDV               | Foot-and-mouth disease virus A                                                            | NC_011450           | Picornaviridae  | Aphthovirus     |
| HaRNAV             | Heterosigma akashiwo RNA virus                                                            | NC_005281           | Marnaviridae    | Marnavirus      |
| HAV                | Hepatitis A virus                                                                         | NC_001489           | Picornaviridae  | Hepatovirus     |
| HPeV               | Human parechovirus                                                                        | NC_001897           | Picornaviridae  | Parechovirus    |
| IFV                | Infectious flacherie virus                                                                | NC_003781           | Iflaviridae     | Iflavirus       |
| JP-A               | Marine RNA virus JP-A                                                                     | NC_009757           | Unassigned      | Unassigned      |
| JP-B               | Marine RNA virus JP-B                                                                     | NC_009758           | Unassigned      | Unassigned      |
| PTV                | Porcine teschovirus 1                                                                     | NC_003985           | Picornaviridae  | Teschovirus     |
| PV                 | Human enterovirus C                                                                       | NC_002058           | Picornaviridae  | Enterovirus     |
| PYFV               | Parsnip yellow fleck virus                                                                | NC_003628           | Secoviridae     | Sequivirus      |
| RsRNAV             | Rhizosolenia setigera RNA Virus                                                           | AB243297            | Unassigned      | Bacillarnavirus |
| RTSV               | Rice tungro spherical virus                                                               | NC_001632           | Secoviridae     | Waikavirus      |
| SDV                | Satsuma dwarf virus                                                                       | NC_003785           | Secoviridae     | Sadwavirus      |
| SVV                | Seneca Valley virus                                                                       | NC_011349           | Picornaviridae  | Senecavirus     |
| TRSV               | Tobacco ringspot virus 1                                                                  | NC_005097           | Secoviridae     | Nepovirus       |
| TSV                | Taura syndrome virus                                                                      | NC_003005           | Dicistroviridae | Aparavirus      |
| ToTV               | Tomato torrado virus                                                                      | NC_009013           | Secoviridae     | Torradovirus    |
| MB1                | 2007 RdRP amplicon from Monterey Bay, CA                                                  | ABV29327            | Unassigned      | Unassigned      |
| KB23               | 2007 RdRP amplicon from Kaneohe Bay, HI                                                   | ABV29326            | Unassigned      | Unassigned      |
| KB22               | 2007 RdRP amplicon from Kaneohe Bay, HI                                                   | ABV29325            | Unassigned      | Unassigned      |
| KB21               | 2007 RdRP amplicon from Kaneohe Bay, HI                                                   | ABV29324            | Unassigned      | Unassigned      |
| KB20               | 2007 RdRP amplicon from Kaneohe Bay, HI                                                   | ABV29323            | Unassigned      | Unassigned      |
| KB19               | 2007 RdRP amplicon from Kaneohe Bay, HI                                                   | ABV29322            | Unassigned      | Unassigned      |
| KB18               | 2007 RdRP amplicon from Kaneohe Bay, HI                                                   | ABV29321            | Unassigned      | Unassigned      |
| KB16               | 2007 RdRP amplicon from Kaneohe Bay, HI                                                   | ABV29319            | Unassigned      | Unassigned      |
| KB15               | 2007 RdRP amplicon from Kaneohe Bay, HI                                                   | ABV29318            | Unassigned      | Unassigned      |
| KB14               | 2007 RdRP amplicon from Kaneohe Bay, HI                                                   | ABV29317            | Unassigned      | Unassigned      |
| KB13               | 2007 RdRP amplicon from Kaneohe Bay, HI                                                   | ABV29316            | Unassigned      | Unassigned      |
| KB12               | 2007 RdRP amplicon from Kaneohe Bay, HI                                                   | ABV29315            | Unassigned      | Unassigned      |
| KB11               | 2007 RdRP amplicon from Kaneohe Bay, HI                                                   | ABV29314            | Unassigned      | Unassigned      |
| KB10               | 2007 RdRP amplicon from Kaneohe Bay, HI                                                   | ABV29313            | Unassigned      | Unassigned      |
| KB9                | 2007 RdRP amplicon from Kaneohe Bay, HI                                                   | ABV29312            | Unassigned      | Unassigned      |
| KB8                | 2007 RdRP amplicon from Kaneohe Bay, HI                                                   | ABV29311            | Unassigned      | Unassigned      |
| KB6                | 2007 RdRP amplicon from Kaneohe Bay, HI                                                   | ABV29309            | Unassigned      | Unassigned      |
| KB5                | 2007 RdRP amplicon from Kaneohe Bay, HI                                                   | ABV29308            | Unassigned      | Unassigned      |
| KB4                | 2007 RdRP amplicon from Kaneohe Bay, HI                                                   | ABV29307            | Unassigned      | Unassigned      |
| KB3                | 2007 RdRP amplicon from Kaneohe Bay, HI                                                   | ABV29306            | Unassigned      | Unassigned      |
| KB2                | 2007 RdRP amplicon from Kaneohe Bay, HI                                                   | ABV29305            | Unassigned      | Unassigned      |
| KB1                | 2007 RdRP amplicon from Kaneohe Bay, HI                                                   | ABV29304            | Unassigned      | Unassigned      |
| B                  | 2003 RdRP amplicon from the Strait of Georgia, BC                                         | AAQ21147            | Unassigned      | Unassigned      |
| C                  | 2003 RdRP amplicon from the Strait of Georgia, BC                                         | AAQ21158            | Unassigned      | Unassigned      |
| D                  | 2003 RdRP amplicon from the Strait of Georgia, BC                                         | AAQ21156            | Unassigned      | Unassigned      |
| JP5                | 2006 RdRP assembled from Strait of Georgia, BC metagenome                                 | DX420985-DX421142   | Unassigned      | Unassigned      |
| JP6                | 2006 RdRP assembled from Strait of Georgia, BC metagenome                                 | DX420985-DX421142   | Unassigned      | Unassigned      |
| JP9                | 2006 RdRP assembled from Strait of Georgia, BC metagenome                                 | DX420985-DX421142   | Unassigned      | Unassigned      |
| JP11               | 2006 RdRP assembled from Strait of Georgia, BC metagenome                                 | DX420985-DX421142   | Unassigned      | Unassigned      |
| JP16               | 2006 RdRP assembled from Strait of Georgia, BC metagenome                                 | DX420985-DX421142   | Unassigned      | Unassigned      |
| JP20               | 2006 RdRP assembled from Strait of Georgia, BC metagenome                                 | DX420985-DX421142   | Unassigned      | Unassigned      |
| JP32               | 2006 RdRP assembled from Strait of Georgia, BC metagenome                                 | DX420985-DX421142   | Unassigned      | Unassigned      |
| JP62               | 2006 RdRP assembled from Strait of Georgia, BC metagenome                                 | DX420985-DX421142   | Unassigned      | Unassigned      |
| JP162              | 2006 RdRP assembled from Strait of Georgia, BC metagenome                                 | DX420985-DX421142   | Unassigned      | Unassigned      |
| JP1743             | 2006 RdRP assembled from Strait of Georgia, BC metagenome                                 | DX420985-DX421142   | Unassigned      | Unassigned      |
| Sc1Fr13012603R     | RdRPsequence amplified with MplSc1 primers from 1.38 g/ml density fraction of 2009 virome | KC620972            | Unassigned      | Unassigned      |
| Sc1Fr13012604R     | RdRPsequence amplified with MplSc1 primers from 1.38 g/ml density fraction of 2009 virome | KC620973            | Unassigned      | Unassigned      |
| Sc1Fr13012607R     | RdRPsequence amplified with MplSc1 primers from 1.38 g/ml density fraction of 2009 virome | KC620974            | Unassigned      | Unassigned      |
| Sc1Fr13012610R     | RdRPsequence amplified with MplSc1 primers from 1.38 g/ml density fraction of 2009 virome | KC620975            | Unassigned      | Unassigned      |
| Sc1Fr13012615R     | RdRPsequence amplified with MplSc1 primers from 1.38 g/ml density fraction of 2009 virome | KC620976            | Unassigned      | Unassigned      |
| Sc1Fr13012617R     | RdRPsequence amplified with MplSc1 primers from 1.38 g/ml density fraction of 2009 virome | KC620977            | Unassigned      | Unassigned      |
