# Supplementary material for: The Characterization of RNA Viruses in Tropical Seawater Using Targeted PCR and Metagenomics
Source: PubMed Central journal article supplement — mBio. 2014 Jun 17;5(3):e01210-14. doi: 10.1128/mBio.01210-14 (PMC4068258; doi:10.1128/mbio.01210-14), 2014-06-17
Supplement: mbo003141874st2.pdf [file mbo003141874st2.pdf]

Table S2

| <b>Name</b> | <b>Sequence (5' - 3')</b>   | <b>°C Annealing</b> | <b>~ product size (bp)</b> | <b>Assay</b>      |
|-------------|-----------------------------|---------------------|----------------------------|-------------------|
| Mplsc1F     | TIGCIGGWGAYTWYARM           | 50                  | 500                        | Degenerate RT-PCR |
| Mplsc1R     | YTCCTTWTCRGSCATKGTA         |                     |                            | Degenerate RT-PCR |
| Mplsc2F     | ITWGCIGGIGATTWCA            | 43                  | 500                        | Degenerate RT-PCR |
| Mplsc2R     | CKYTTCARRAAWTCAGCATC        |                     |                            | Degenerate RT-PCR |
| FR26RV-N    | GCCGGAGCTCTGCAGATATCNNNNNN  | NA                  | NA                         | RP-SISPA          |
| FR40RV-T    | GCCGGAGCTCTGCAGATATC(T)20   | NA                  | NA                         | RP-SISPA          |
| FR20RV      | GCCGGAGCTCTGCAGATATC        | 65                  | NA                         | RP-SISPA          |
| Sc1Fr13A_F  | TTCTCCTGAAAACCTATCTGTTATGGA | 62                  | 211                        | RT-qPCR           |
| Sc1Fr13A_R  | CTGAAAGGCAGGTAAATTCTTACGC   |                     |                            | RT-qPCR           |
| Sc1Fr18B_F  | GAACTGCTTATTCAGGTTGCGATG    | 63                  | 255                        | RT-qPCR           |
| Sc1Fr18B_R  | GTCCGATGCCTGAATCAACTCTC     |                     |                            | RT-qPCR           |
